# Supplementary material for: Case Report and Review of the Literature: A New and a Recurrent Variant in the VARS2 Gene Are Associated With Isolated Lethal Hypertrophic Cardiomyopathy, Hyperlactatemia, and Pulmonary Hypertension in Early Infancy
Source: PubMed Central journal article supplement (PMC8085550; doi:10.3389/fped.2021.660076), 2021-04-16
Supplement: Table_1.pdf [file Table_1.pdf]

**Supplementary Table 1:** Densitometric analysis of the western blotting experiments shown in Figure 2 and Supplementary Figure 1

| Ratio                                        | Controls |        |     | Patient |       |     | Relative amount (%) | P value       |
|----------------------------------------------|----------|--------|-----|---------|-------|-----|---------------------|---------------|
|                                              | Mean     | SD     | n   | Mean    | SD    | n   |                     |               |
| <b>Western blot- technical replicate 1</b>   |          |        |     |         |       |     |                     |               |
| VARS2/VDAC1                                  | 0,5659   | 0,2092 | n=7 | 0,1721  | 0,038 | n=2 | 30                  | <b>0,0393</b> |
| VARS2/SDHA                                   | 0,8886   | 0,1701 | n=7 | 0,1438  | 0,008 | n=2 | 16                  | <b>0,0006</b> |
| VARS2/CS                                     | 1,695    | 0,9505 | n=7 | 0,2684  | 0,008 | n=2 | 16                  | 0,0556        |
| VARS2/GPI                                    | 1,457    | 0,5605 | n=7 | 0,5017  | 0,283 | n=2 | 34                  | 0,0594        |
| <b>Mean reduction of VARS2 protein: 76%</b>  |          |        |     |         |       |     |                     |               |
| NDUFS4/VDAC1                                 | 1,393    | 0,5595 | n=7 | 0,9939  | 0,446 | n=2 | 71                  | 0,3914        |
| NDUFS4/SDHA                                  | 0,8981   | 0,381  | n=7 | 0,2948  | 0,022 | n=2 | 33                  | 0,0704        |
| NDUFS4/CS                                    | 1,681    | 1,011  | n=7 | 0,5513  | 0,056 | n=2 | 33                  | 0,1763        |
| NDUFS4/GPI                                   | 0,5781   | 0,3764 | n=7 | 0,349   | 0,03  | n=2 | 60                  | 0,4394        |
| <b>Mean reduction of NDUFS4 protein: 51%</b> |          |        |     |         |       |     |                     |               |
| <b>Western blot- technical replicate 2</b>   |          |        |     |         |       |     |                     |               |
| NDUFS4/VDAC1                                 | 0,8682   | 0,3252 | n=3 | 0,2622  | n.a   | n=1 | 30                  | n.a           |
| NDUFS4/SDHA                                  | 0,5028   | 0,2419 | n=3 | 0,0857  | n.a   | n=1 | 17                  | n.a           |
| NDUFS4/CS                                    | 0,5631   | 0,2685 | n=3 | 0,1778  | n.a   | n=1 | 32                  | n.a           |
| NDUFS4/GPI                                   | 3,42     | 1,098  | n=3 | 1,798   | n.a   | n=1 | 53                  | n.a           |
| <b>Mean reduction of NDUFS4 protein: 67%</b> |          |        |     |         |       |     |                     |               |
| SDHA/VDAC1                                   | 1,822    | 0,3001 | n=3 | 3,079   | n.a   | n=1 | 169                 | n.a           |
| SDHA/CS                                      | 1,147    | 0,1639 | n=3 | 2,087   | n.a   | n=1 | 182                 | n.a           |
| SDHA/GPI                                     | 7,709    | 3,015  | n=3 | 21,11   | n.a   | n=1 | 274                 | n.a           |
| UQCRC2/VDAC1                                 | 1,329    | 0,341  | n=3 | 0,6968  | n.a   | n=1 | 52                  | n.a           |
| UQCRC2/SDHA                                  | 0,7514   | 0,2754 | n=3 | 0,2263  | n.a   | n=1 | 30                  | n.a           |
| UQCRC2/CS                                    | 0,8636   | 0,3532 | n=3 | 0,4724  | n.a   | n=1 | 55                  | n.a           |

|               |        |        |     |        |     |     |     |     |
|---------------|--------|--------|-----|--------|-----|-----|-----|-----|
| UQCRC2/GPI    | 5,255  | 0,4552 | n=3 | 4,778  | n.a | n=1 | 91  | n.a |
| MT-CO2/VDAC1  | 0,4265 | 0,1288 | n=3 | 0,2428 | n.a | n=1 | 57  | n.a |
| MT-CO2/SDHA   | 0,2371 | 0,0812 | n=3 | 0,0792 | n.a | n=1 | 33  | n.a |
| MT-CO2/CS     | 0,2636 | 0,0503 | n=3 | 0,1652 | n.a | n=1 | 63  | n.a |
| MT-CO2/GPI    | 1,853  | 0,925  | n=3 | 1,671  | n.a | n=1 | 90  | n.a |
| ATP5F1A/VDAC1 | 2,444  | 0,3096 | n=3 | 3,589  | n.a | n=1 | 147 | n.a |
| ATP5F1A/SDHA  | 1,35   | 0,1308 | n=3 | 1,166  | n.a | n=1 | 86  | n.a |
| ATP5F1A/CS    | 1,534  | 0,0808 | n=3 | 2,433  | n.a | n=1 | 159 | n.a |
| ATP5F1A/GPI   | 10,38  | 3,906  | n=3 | 24,61  | n.a | n=1 | 237 | n.a |

Ratio: Ratio of the band intensities of western blot analysis. SD: standard deviation;  
n.a: not applicable
